# Supplementary material
Source: publisher figshare collection journal article supplement (https://acs.figshare.com/ndownloader/files/4014067)
Supplement: Supplementary file 1 [file 4014067]

# **Orthoformimycin, a selective inhibitor of bacterial translation elongation from *Streptomyces* containing an unusual orthoformate**

Sonia I. Maffioli<sup>\*1</sup>, Attilio Fabbretti<sup>2</sup>, Letizia Brandi<sup>2</sup>, Andreas Savelsbergh<sup>3</sup>, Paolo Monciardini<sup>1</sup>, Monica Abbondi<sup>4</sup>, Rossana Rossi<sup>5</sup>, Stefano Donadio<sup>1</sup>, Claudio O. Gualerzi<sup>\*2</sup>

<sup>1</sup> *Naicons, 20138 Milano, Italy;* <sup>2</sup> *Laboratory of Genetics, Department of Biosciences and Biotechnology, University of Camerino, 62032 Camerino, Italy;* <sup>3</sup> *Institut für Medizinische Biochemie, Universität Witten/Herdecke, 58453 Witten, Germany;* <sup>4</sup> *Vicuron Pharmaceuticals, 21040 Gerenzano, Italy;* <sup>5</sup> *ITB-CNR, 20090 Segrate, Italy.*

## **Supporting Information**

**Supplementary figures and tables:**

**Supplementary Figure S1**  $^1\text{H}$ -NMR spectrum of Orthoformimycin in  $\text{CD}_3\text{CN}$ .

**Supplementary Figure S2** COSY spectrum of Orthoformimycin in  $\text{CD}_3\text{CN}$ .

**Supplementary Figure S3** TOCSY spectrum of Orthoformimycin in  $\text{CD}_3\text{CN}$ .

**Supplementary Figure S4** HSQC spectrum of Orthoformimycin in  $\text{CD}_3\text{CN}$ .

**Supplementary Figure S5** HMBC spectrum of Orthoformimycin in  $\text{CD}_3\text{CN}$ .

**Supplementary Figure S6** NOESY spectrum of Orthoformimycin in  $\text{CD}_3\text{CN}$ .

**Supplementary Figure S7** Effect of orthoformimycin and other antibiotics on P-site and A-site decoding activity

**Supplementary Figure S8** Effect of orthoformimycin and other antibiotics on various translocation steps

**Supplementary Table S1** HR-MS and  $\text{MS}^n$  data for Orthoformimycin ( $m/z$  540) and its acetylated derivative ( $m/z$  680) (See Fig.3)

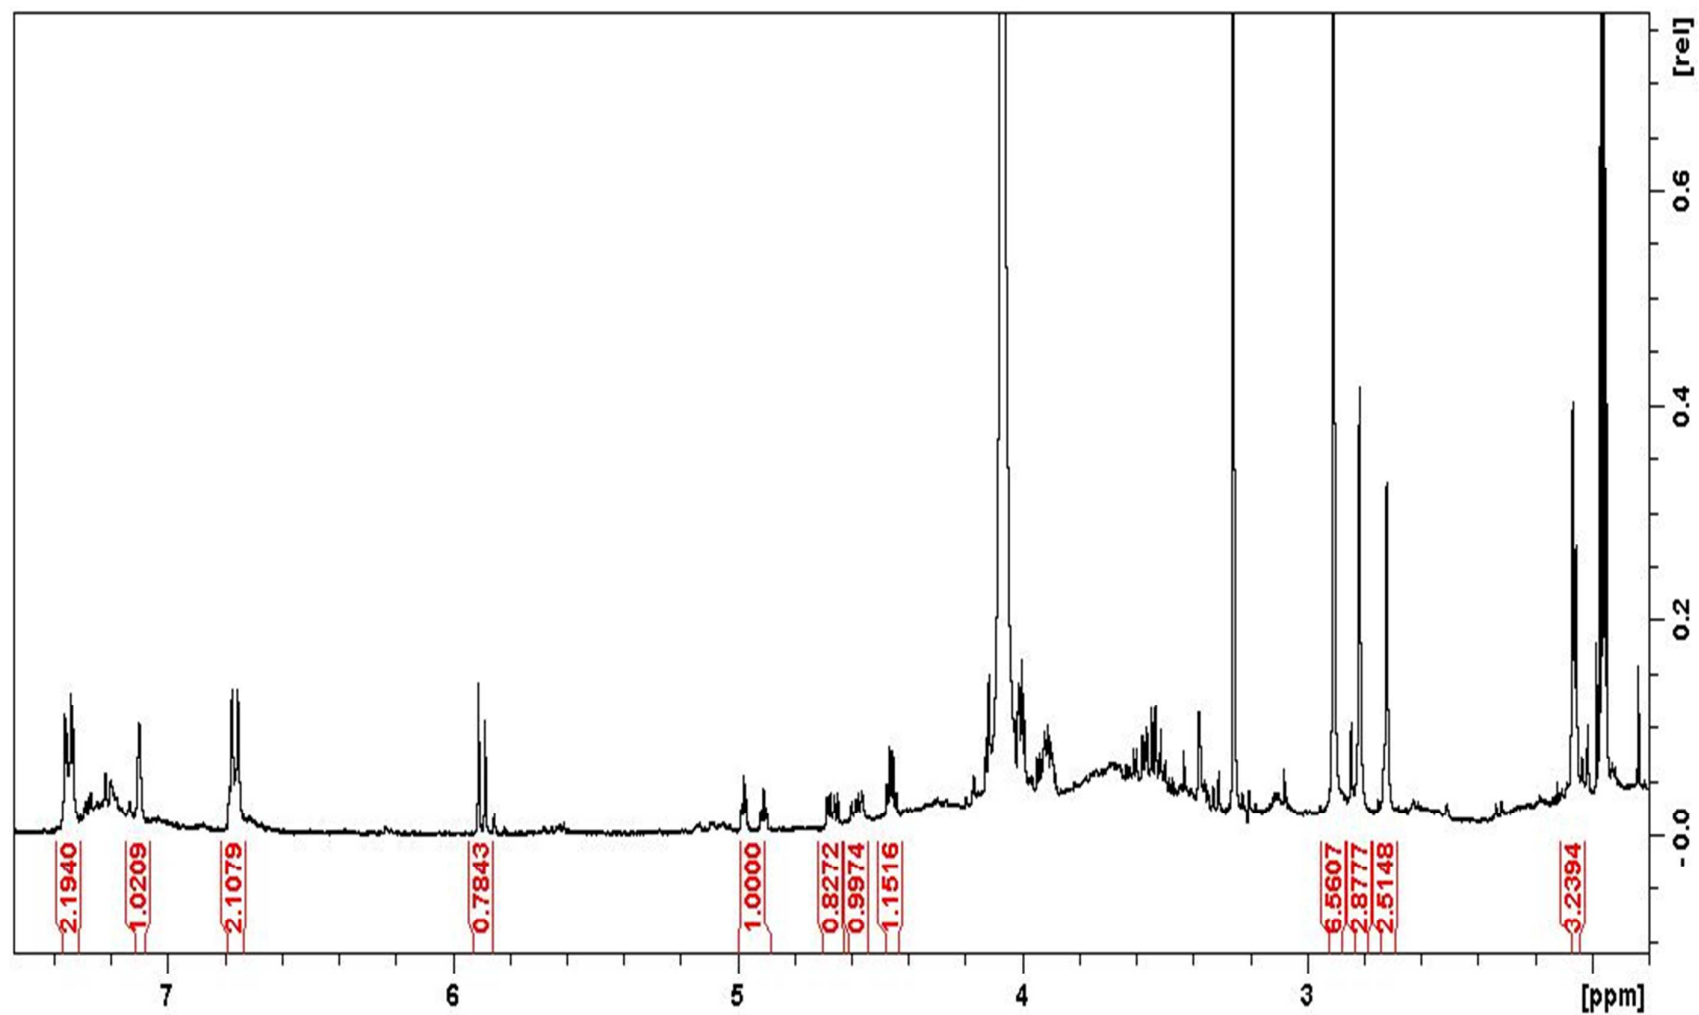

**Supplementary Figure S1**  $^1\text{H}$ -NMR spectrum of Orthoformimycin in  $\text{CD}_3\text{CN}$ .

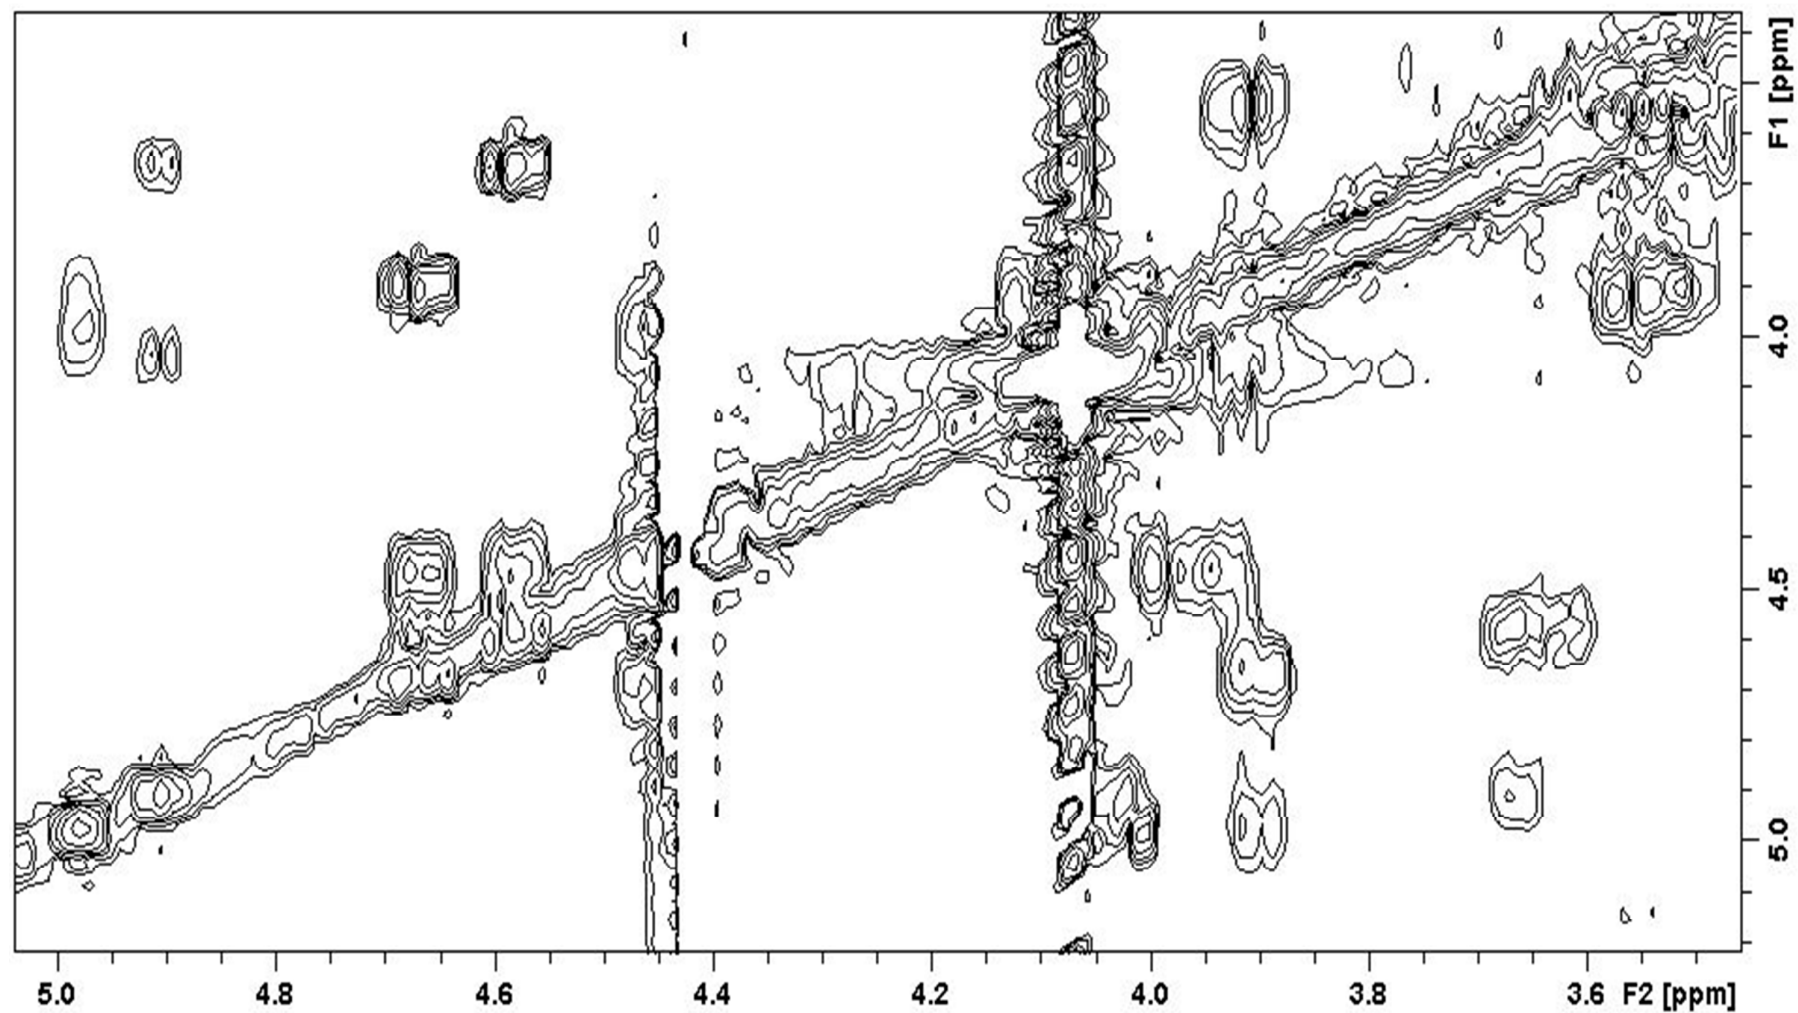

**Supplementary Figure S2** COSY spectrum of Orthoformimycin in CD<sub>3</sub>CN.

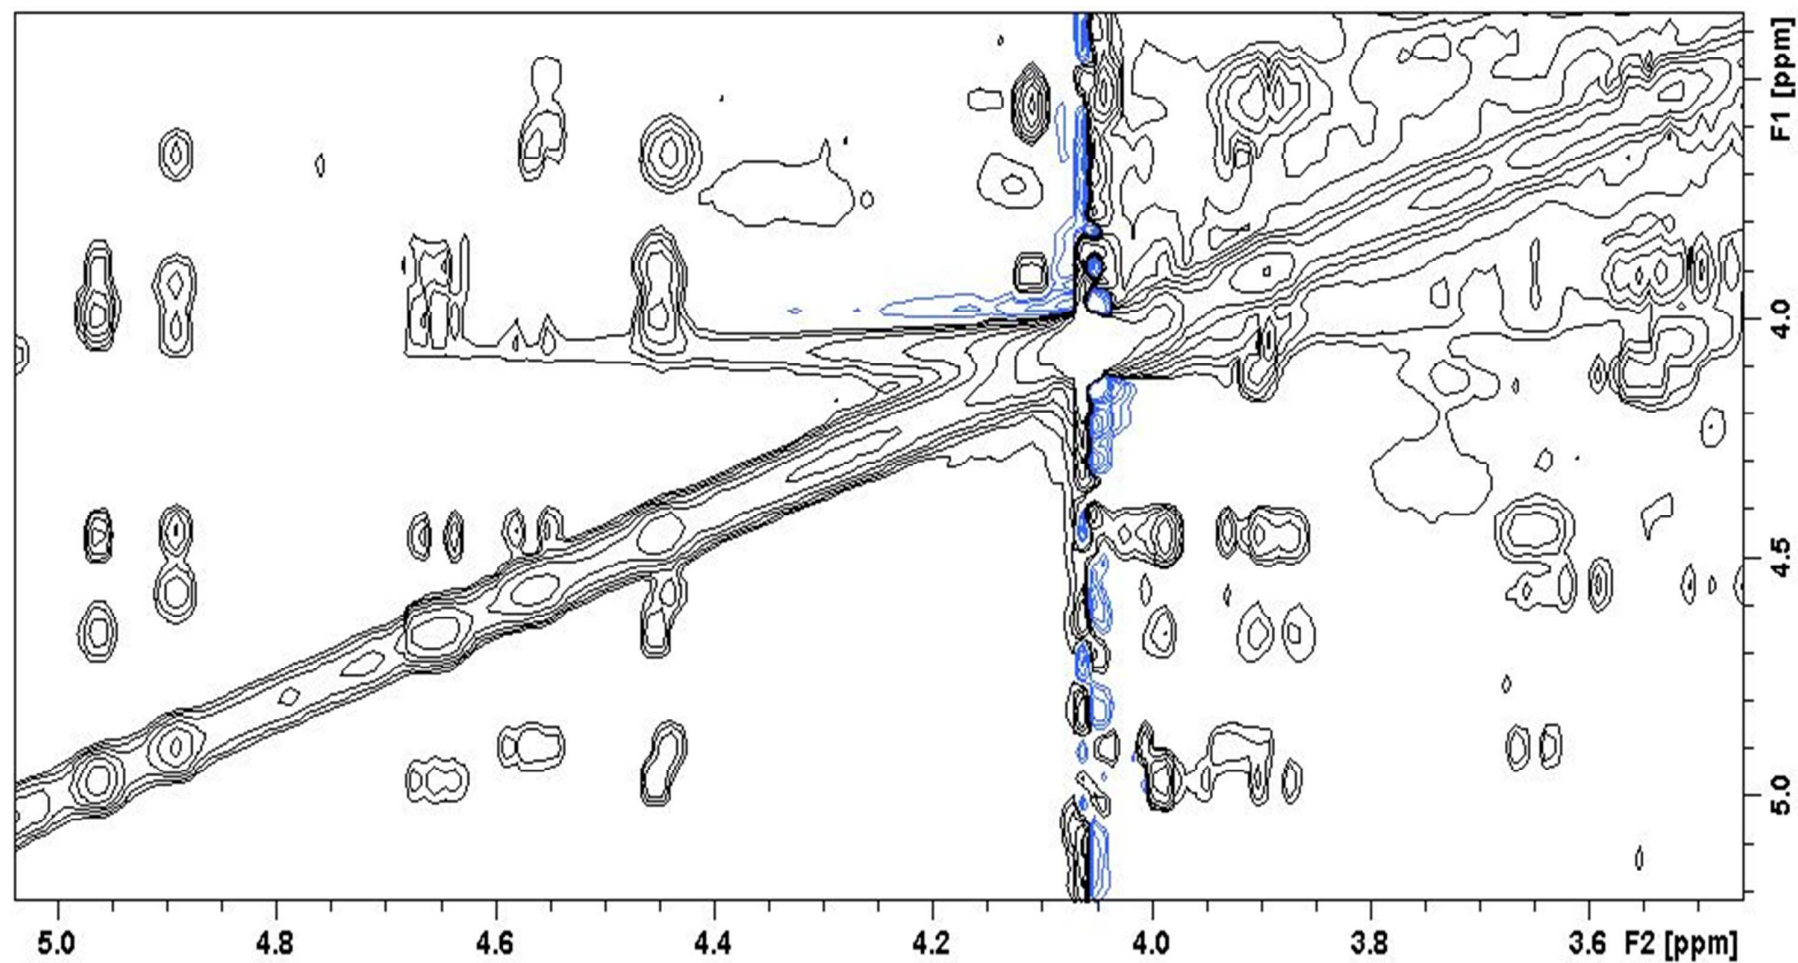

**Supplementary Figure S3** TOCSY spectrum of Orthoformimycin in CD<sub>3</sub>CN.

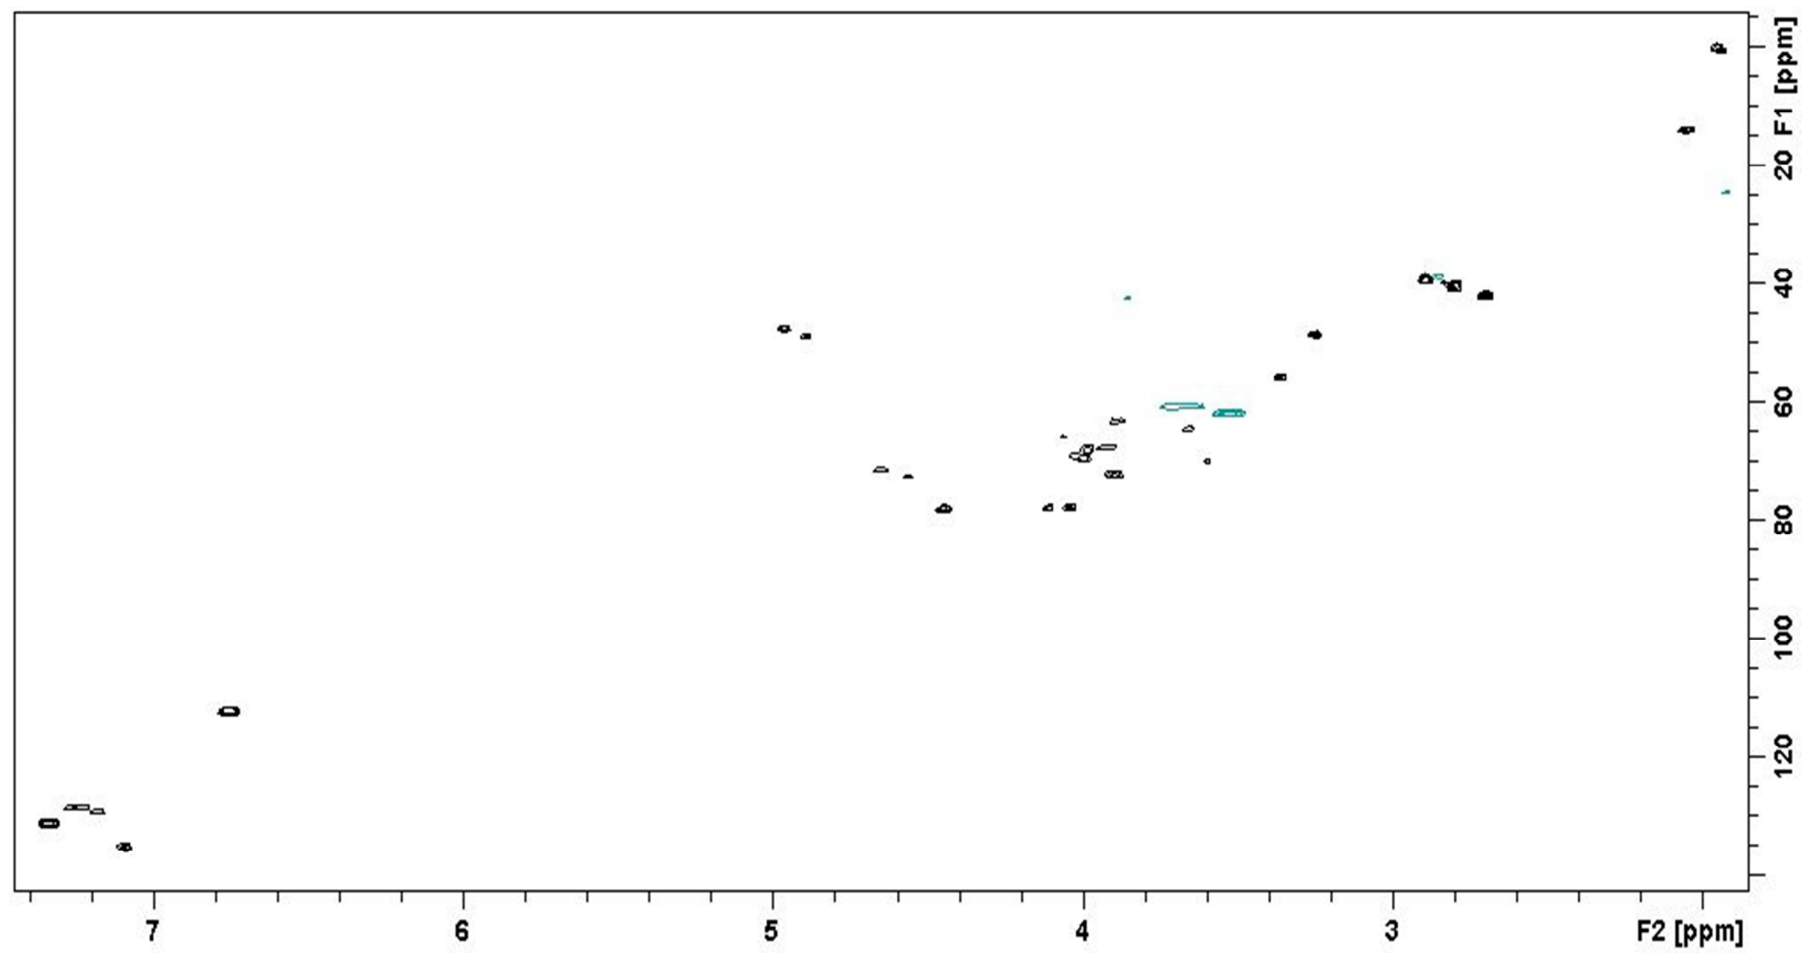

**Supplementary Figure S4** HSQC spectrum of Orthoformimycin in CD<sub>3</sub>CN.

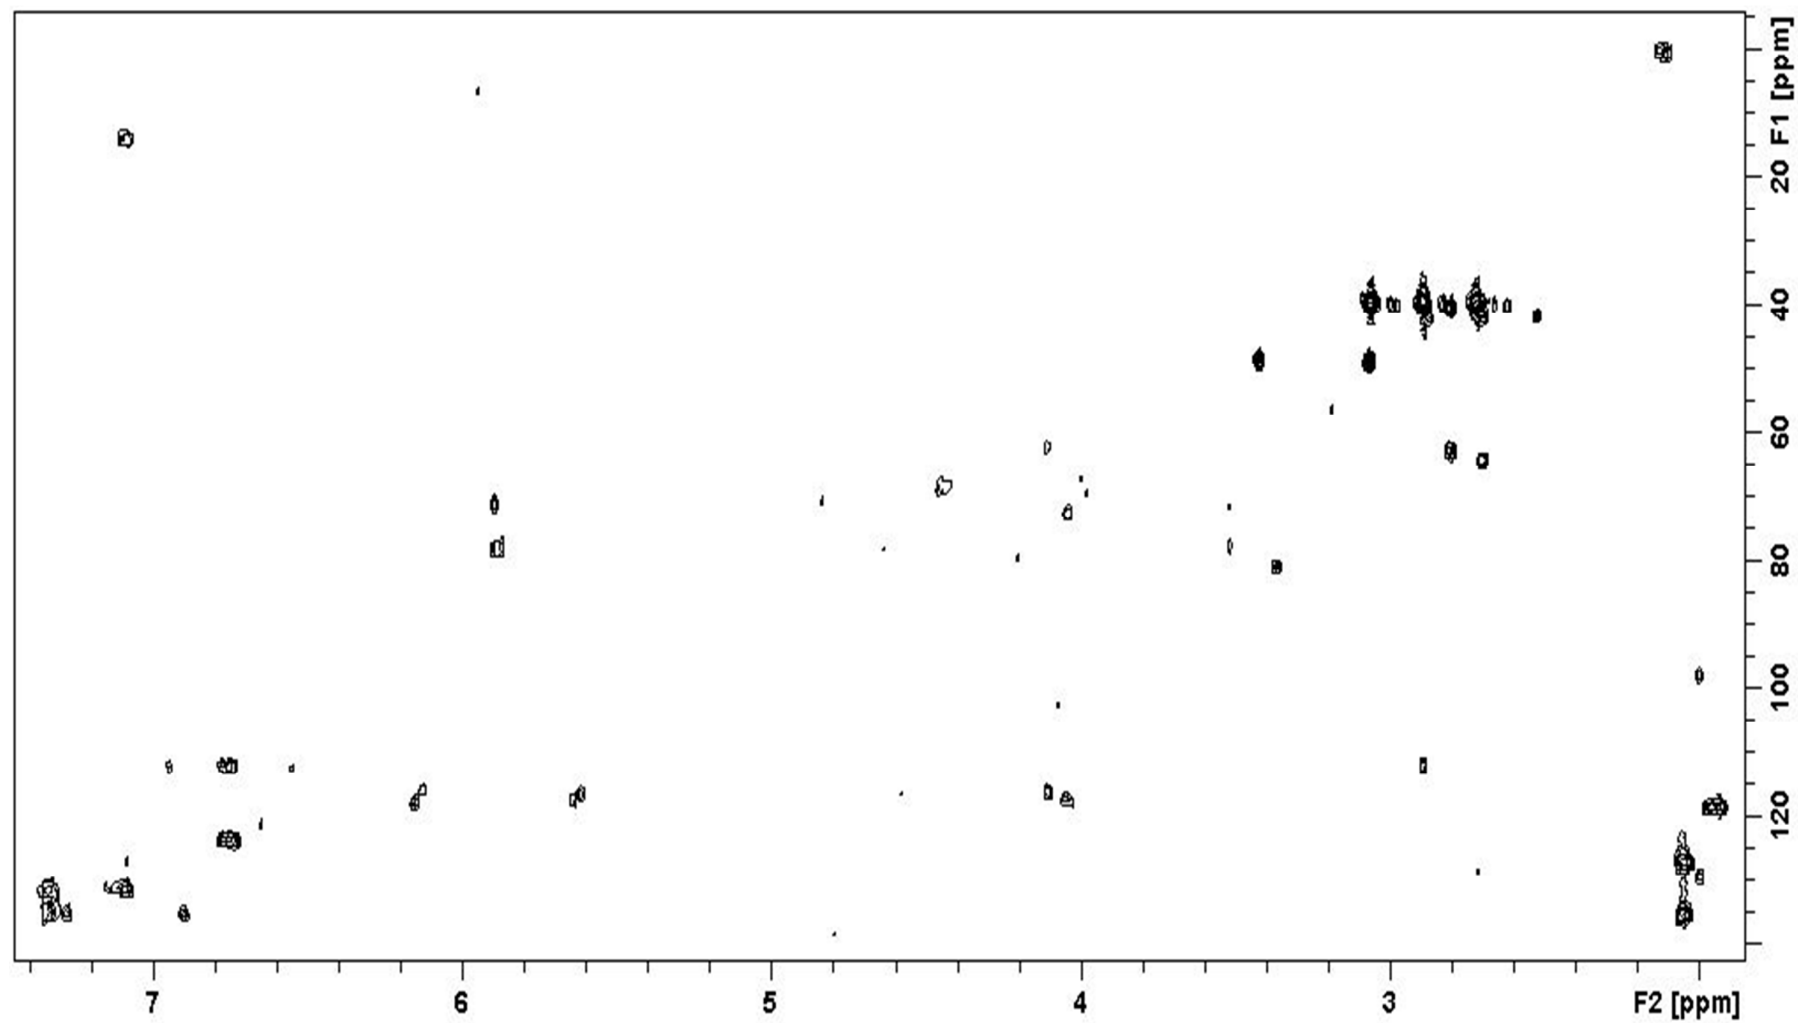

**Supplementary Figure S5** HMBC spectrum of Orthoformimycin in CD<sub>3</sub>CN.

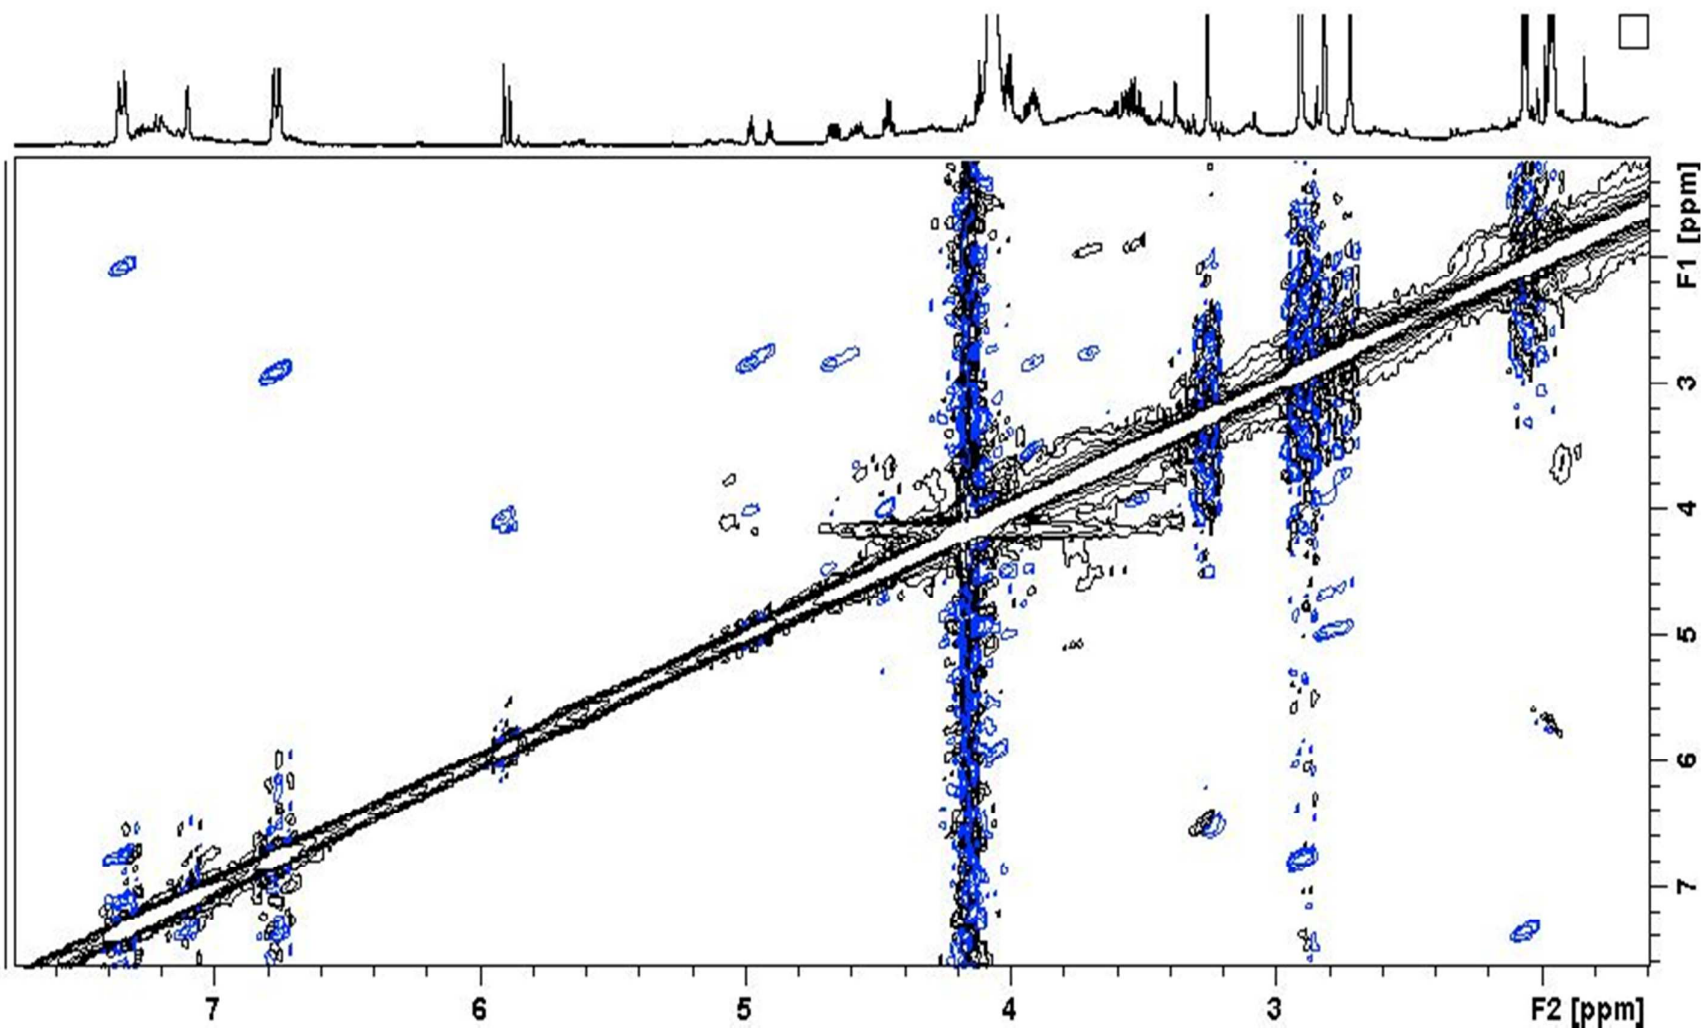

**Supplementary Figure S6** NOESY spectrum of Orthoformimycin in CD<sub>3</sub>CN.



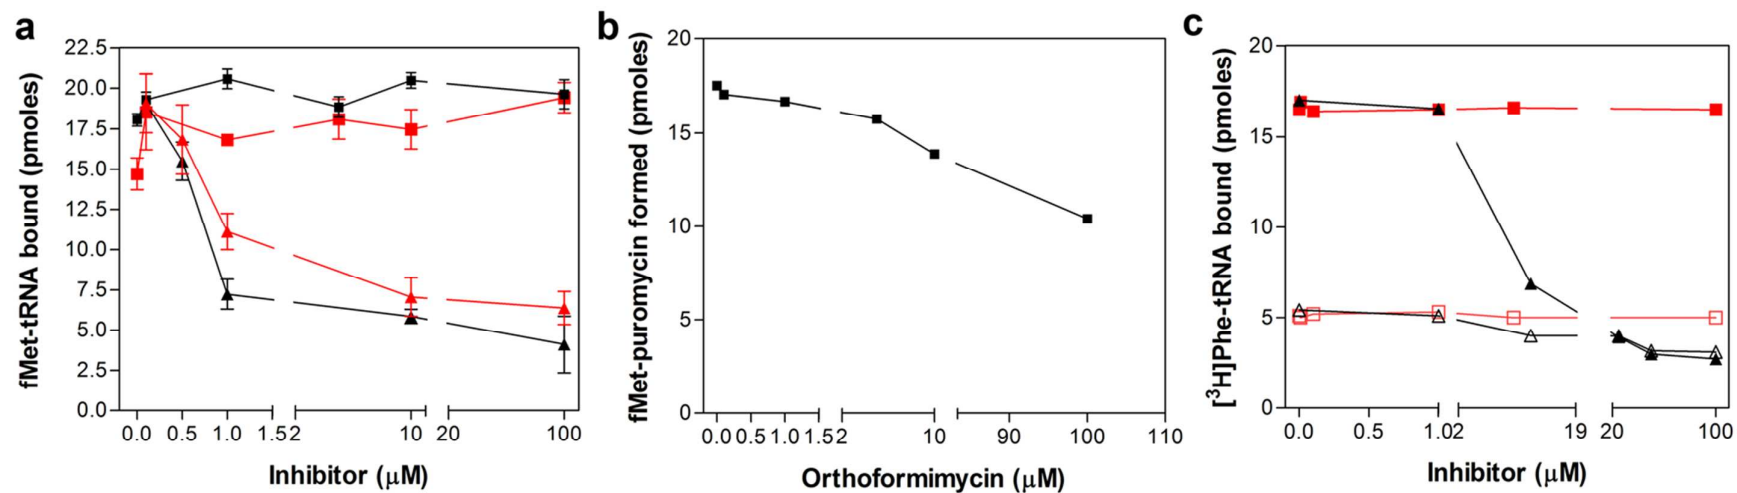

**Supplementary Figure S7** Effect of orthoformimycin and other antibiotics on P-site and A-site decoding activity. a) Effect of the indicated orthoformimycin (■, ■) and GE81112<sup>7</sup> (▲, ▲) concentrations on the P-site fMet-tRNA binding to 30S (red) or 70S (black) ribosomes to yield 30S and 70S initiation complexes (ICs), respectively; b) effect of the indicated concentrations of orthoformimycin on the formation of fMet-puromycin upon addition of 50S subunits and puromycin to the 30S IC formed as in panel a); c) effect of the indicated orthoformimycin (■, □) and tetracycline (▲, △) concentrations on the EF-Tu-dependent (■, ▲) and EF-Tu-independent (□, △) A-site binding of Phe-tRNA to poly(U)-programmed 30S ribosomal subunits.

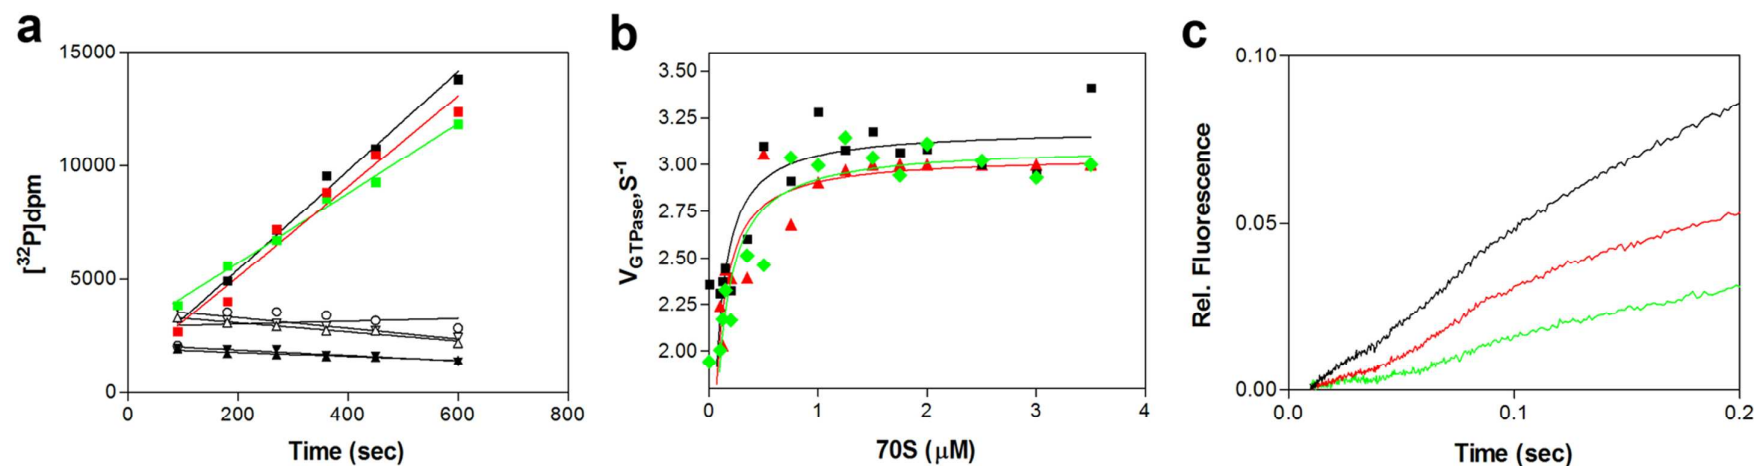

**Supplementary Figure S8** Effect of orthoformimycin and other antibiotics on various translocation steps. a) Effect of 20  $\mu\text{M}$  of orthoformimycin ( $\blacksquare$ ) or GE82832/dityromycin<sup>9</sup> ( $\blacksquare$ ) on the multiple turnover EF-G-dependent GTP hydrolysis; the positive control is the complete system without inhibitors ( $\blacksquare$ ) whereas negative controls are a system containing orthoformimycin ( $\triangle, \nabla$ ) or GE82832/dityromycin ( $\blacktriangle, \blacktriangledown$ ) but lacking either ribosomes ( $\triangle, \blacktriangle$ ) or EF-G ( $\nabla, \blacktriangledown$ ) or lacking ribosomes, EF-G and antibiotics (O); b) fast kinetics of 70S-dependent and EF-G-dependent GTP hydrolysis in the absence of antibiotics ( $\blacksquare$ ) or in the presence of 20  $\mu\text{M}$  of either orthoformimycin ( $\blacktriangle$ ) or GE82832/dityromycin ( $\blacklozenge$ ); c)  $\text{P}_i$  release from EF-G-GDP- $\text{P}_i$  in the absence (black tracing) or in the presence of 20  $\mu\text{M}$  of either orthoformimycin (red tracing) or GE82832/dityromycin (green tracing).

| <i>m/z</i>                                                                                         |                   |                     | <b>R<sub>1</sub><sup>a</sup></b> | <b>R<sub>2</sub><sup>a</sup></b> | <b>ion</b>                  | <b>formula</b>                                                 | <b>dbe<sup>c</sup></b> |
|----------------------------------------------------------------------------------------------------|-------------------|---------------------|----------------------------------|----------------------------------|-----------------------------|----------------------------------------------------------------|------------------------|
| <b>nominal</b>                                                                                     | <b>calculated</b> | <b>experimental</b> |                                  |                                  |                             |                                                                |                        |
| 540                                                                                                | 540,2552          | 540,2582            | H                                | H                                | [M+H] <sup>+</sup>          | C <sub>25</sub> H <sub>38</sub> N <sub>3</sub> O <sub>10</sub> | 9                      |
| 680                                                                                                | 680,3031          | 680,3051            | Ac                               | Me                               | [M+H] <sup>+</sup>          | C <sub>32</sub> H <sub>46</sub> N <sub>3</sub> O <sub>13</sub> | 12                     |
| 404                                                                                                | 404,2180          | 404,2212            | H                                | -                                | M <sup>+</sup> <sup>b</sup> | C <sub>4</sub> H <sub>8</sub> O <sub>5</sub>                   | 9                      |
| 488                                                                                                | 488,2396          | 488,2389            | Ac                               | -                                | M <sup>+</sup> <sup>b</sup> | C <sub>7</sub> H <sub>12</sub> O <sub>6</sub>                  | 11                     |
| 136                                                                                                | 136,0372          | 136,0370            | H                                | H                                | Neutral loss                | C <sub>20</sub> H <sub>31</sub> N <sub>3</sub> O <sub>5</sub>  | 1                      |
| 394                                                                                                | 394,2337          | 394,2357            | H                                | -                                | [M+H] <sup>+</sup>          | C <sub>20</sub> H <sub>31</sub> N <sub>3</sub> O <sub>5</sub>  | 7                      |
| 206                                                                                                | 206,1266          | 206,1271            | H                                | -                                | Neutral loss                | C <sub>8</sub> H <sub>18</sub> N <sub>2</sub> O <sub>4</sub>   | 1                      |
| 188                                                                                                | 188,1070          | 188,1086            | -                                | -                                | M <sup>+</sup> <sup>b</sup> | C <sub>12</sub> H <sub>14</sub> NO                             | 7                      |
| (a) as defined in figure 3<br>(b) not revealed in negative ion mode<br>(c) double bond equivalents |                   |                     |                                  |                                  |                             |                                                                |                        |

**Supplementary Table S1** HR-MS and MS<sup>n</sup> data for Orthoformimycin (*m/z* 540) and its acetylated derivative (*m/z* 680) (See Fig.3)
